# Supplementary material for: Ecological connectivity of the marine protected area network in the Baltic Sea, Kattegat and Skagerrak: Current knowledge and management needs
Source: PubMed Central journal article supplement (PMC9005595; doi:10.1007/s13280-021-01684-x), 2021-12-29
Supplement: 13280_2021_1684_MOESM1_ESM.pdf [file 13280_2021_1684_MOESM1_ESM.pdf]

## **Title Page**

### *Title*

Ecological connectivity of the marine protected area network in the Baltic Sea, Kattegat and Skagerrak: current knowledge and management needs

Authors: Charlotte Berkström, Lovisa Wennerström, and Ulf Bergström

### *Word count*

12 283

### *Acknowledgements*

We wish to thank the Swedish Agency for Marine and Water Management (SwAM) for funding this project and Leonard Sandin for valuable comments on an earlier version of the manuscript. We also wish to thank Mårten Erlandsson for help with images and two anonymous reviewers for helpful comments.

### *Author Contact details*

Charlotte Berkström

Address: Department of Aquatic Resources, Swedish University of Agricultural Sciences, Institute of Coastal Research, Skolgatan 6, SE 742 42 Öregrund, Sweden

e-mail: [charlotte.berkstrom@slu.se](mailto:charlotte.berkstrom@slu.se)

Phone: + 46 10 4784165

Lovisa Wennerström

Address: Department of Aquatic Resources, Swedish University of Agricultural Sciences, Institute of Coastal Research, Skolgatan 6, SE 742 42 Öregrund, Sweden

e-mail: [lovisa.wennerstrom@slu.se](mailto:lovisa.wennerstrom@slu.se)

Ulf Bergström

Address: Department of Aquatic Resources, Swedish University of Agricultural Sciences, Institute of Coastal Research, Skolgatan 6, SE 742 42 Öregrund, Sweden

e-mail: [ulf.bergstrom@slu.se](mailto:ulf.bergstrom@slu.se)

## **Title: Connectivity of the marine protected area network in the Baltic Sea, Skagerrak and Kattegat: current knowledge and management needs**

### **Appendix S1**

Search strings in Web of Science: (nov 2020)

Connectivity\* coherence\* marine protected area\*  
Connectivity\* coherence\* marine reserve\*  
Connectivity\* coherence\* marine spatial planning\*  
Connectivity\* coherence\* Baltic Sea\*  
Connectivity\* coherence\* Swedish west coast\*  
Connectivity\* coherence\* Skagerrak\*  
Connectivity\* coherence\* Kattegat\*  
Ecological coherence\* marine protected area\*  
Ecological coherence\* marine reserve\*  
Ecological coherence\* marine spatial planning\*  
Ecological coherence\* Baltic Sea\*  
Ecological coherence\* Swedish west coast\*  
Ecological coherence\* Skagerrak\*  
Ecological coherence\* Kattegat\*  
Connectivity\* Baltic Sea\*  
Connectivity\* Swedish west coast\*  
Connectivity\* Skagerrak\*  
Connectivity\* Kattegat\*  
Dispersal\* Baltic Sea\*  
Dispersal\* Swedish west coast\*  
Dispersal\* Skagerrak\*  
Dispersal\* Kattegat\*  
Fish migration\* Baltic Sea\*  
Fish migration\* Swedish west coast\*  
Fish migration\* Skagerrak\*  
Fish migration\* Kattegat\*  
Home range\* fish\* Baltic Sea\*  
Home range\* fish\* Swedish west coast\*  
Home range\* fish\* Skagerrak\*  
Home range\* fish\* Kattegat\*  
Tagging\* Baltic Sea\*  
Tagging\* Swedish west coast\*  
Tagging\* Skagerrak\*  
Tagging\* Kattegat\*  
Nursery\* Baltic Sea\*  
Nursery\* Swedish west coast\*  
Nursery\* Skagerrak\*  
Nursery\* Kattegat\*  
Spawning migration\* Baltic Sea\*  
Spawning migration\* Swedish west coast\*  
Spawning migration\* Skagerrak\*  
Spawning migration\* Kattegat\*  
Fish\* Swedish west coast\*  
Marine green infrastructure\*  
green infrastructure\* Connectivity\* aquatic\*  
green-blue infrastructure\*

green infrastructure\* connectivity\* Europe\*  
ecological corridor\* Baltic Sea\*  
ecological corridor \* Skagerrak\*  
ecological corridor \* Kattegat\*

**Table S1. References to all distance values per species in table 2. All references are from the Baltic Sea, Skagerrak and/or Kattegat unless stated otherwise.**

| <b>Species</b>                  | <b>Common name</b>     | <b>References on dispersal and movement measurements</b>                                                                                                                                                                                                                                                          |
|---------------------------------|------------------------|-------------------------------------------------------------------------------------------------------------------------------------------------------------------------------------------------------------------------------------------------------------------------------------------------------------------|
| <i>Abramis brama</i>            | Freshwater bream       | Aro (1989)                                                                                                                                                                                                                                                                                                        |
| <i>Acipenser oxyrinchus</i>     | Atlantic Sturgeon      | Stakėnas & Pilinkovskij (2019)                                                                                                                                                                                                                                                                                    |
| <i>Ammodytes marinus</i>        | Lesser sand-eel        | Jiménez-Mena et al. (2020)                                                                                                                                                                                                                                                                                        |
| <i>Amphibalanus improvisus</i>  | Bay barnacle           | Corell et al. (2012)                                                                                                                                                                                                                                                                                              |
| <i>Anguilla anguilla</i>        | European eel           | Dannewitz et al. (2005), Bergström et al. (2007), Enbody et al. (2021) Fishbase.com                                                                                                                                                                                                                               |
| <i>Ascidia mentula</i>          | Tunicate               | Havenhand (1991)                                                                                                                                                                                                                                                                                                  |
| <i>Ascophyllum nodosum</i>      | Knotted wrack          | Dudgeon et al. (2001) - from USA, Coyer et al. (2003) and references in paper                                                                                                                                                                                                                                     |
| <i>Aurelia aurita</i>           | Moon jellyfish         | Moksnes et al. (2014b)                                                                                                                                                                                                                                                                                            |
| <i>Cancer pagurus</i>           | Edible/Brown crab      | Karlsson & Christiansen (1996) and references in paper – from Norway, Ungfors et al. (2007), Ungfors et al. (2009) and references in paper, Artfakta.se                                                                                                                                                           |
| <i>Carcinus maenas</i>          | European shore crab    | Moksnes et al. (2014a)                                                                                                                                                                                                                                                                                            |
| <i>Ciona intestinalis</i>       | Vase tunicate          | Hudson et al. (2020)                                                                                                                                                                                                                                                                                              |
| <i>Clupea harengus</i>          | Atlantic herring       | Weber (1975), Saulamo & Neuman (2002), Bekkevold et al. (2005), Jörgensen et al. (2005), Bergström et al. (2007), Gaggiotti et al. (2009), Larsson et al. (2010), Bekkevold et al. (2011), Corander et al. (2013), Teacher et al. (2013), Claussen et al. (2015) and references in paper, Bekkevold et al. (2016) |
| <i>Coregonus maraena</i>        | Maraena whitefish      | Lehtonen & Himberg (1992), Bergström et al. (2007), Olsson et al. (2012)                                                                                                                                                                                                                                          |
| <i>Coregonus maraena</i>        | Maraena whitefish      | Aro (1989), Lehtonen & Himberg (1992), Bergström et al. (2007), Fishbase.com                                                                                                                                                                                                                                      |
| <i>Coryphaenoides rupestris</i> | Roundnose grenadier    | Delaval et al. (2018)                                                                                                                                                                                                                                                                                             |
| <i>Cottus gobio</i>             | Bullhead               | Corell et al. (2012)                                                                                                                                                                                                                                                                                              |
| <i>Ctenolabrus rupestris</i>    | Goldsinny wrasse       | Sayer (2001) – from UK                                                                                                                                                                                                                                                                                            |
| <i>Cyclopterus lumpus</i>       | Lumpfish               | Whittaker et al. (2018)                                                                                                                                                                                                                                                                                           |
| <i>Esox lucius</i>              | Pike                   | Aro (1989), Karås & Lehtonen (1993), Laikre et al. (2005), Bergström et al. (2007), Bekkevold et al. (2015), Larsson et al. (2015), Tibblin et al. (2016), Wennerström et al. (2016), Jacobsen et al. (2017), Nordahl et al. (2019), Möller et al. (2021), Fishbase.com                                           |
| <i>Fucus radicans</i>           | Baltic bladderwrack    | Coyer et al. (2003) and references in paper, Jonsson et al. (2018) and references in paper                                                                                                                                                                                                                        |
| <i>Fucus serratus</i>           | Toothed/Serrated wrack | Coyer et al. (2003) and references in paper                                                                                                                                                                                                                                                                       |
| <i>Fucus vesiculosus</i>        | Bladderwrack           | Coyer et al. (2003) and references in paper, Tatarenkov et al. (2007), Pereyra et al. (2013), Rothäusler et al. (2015), Jonsson et al. (2018) and references in paper                                                                                                                                             |

|                               |                          |                                                                                                                                                                                                                                                                                                                                                                                  |
|-------------------------------|--------------------------|----------------------------------------------------------------------------------------------------------------------------------------------------------------------------------------------------------------------------------------------------------------------------------------------------------------------------------------------------------------------------------|
| <i>Gadus morhua</i>           | Atlantic cod             | Baltic Sea: Saulamo & Neuman (2002), Nielsen et al. (2003), Nielsen et al. (2005), Bergström et al. (2007), Kijewska et al. (2011), Stroganov et al. (2013); Kattegatt/Skagerrak: Knutsen et al. (2003), Jorde et al. (2007), Øresland & André (2008), Knutsen et al. (2011), André et al. (2016), Barth et al. (2017), Spies et al. (2018), Svedäng et al. (2018), Fishbase.com |
| <i>Gasterosteus aculeatus</i> | Three-spined stickleback | DeFaveri et al. (2012), DeFaveri et al. (2013b), DeFaveri et al. (2013a), Guo et al. (2015)                                                                                                                                                                                                                                                                                      |
| <i>Gobius niger</i>           | Black goby               | Corell et al. (2012)                                                                                                                                                                                                                                                                                                                                                             |
| <i>Gymnocephalus cernuus</i>  | Ruffe                    | Gutsch & Hoffman (2016)                                                                                                                                                                                                                                                                                                                                                          |
| <i>Hediste diversicolor</i>   | Ragworm                  | Einfeldt et al. (2014)                                                                                                                                                                                                                                                                                                                                                           |
| <i>Homarus gammarus</i>       | European Lobster         | Moland et al. (2011b), Moland et al. (2011a), Huserbråten et al. (2013), Moland et al. (2013b), Moland et al. (2013a), Øresland & Ulmestrand (2013), Thorbjørnsen et al. (2018)                                                                                                                                                                                                  |
| <i>Idotea balthica</i>        | Baltic isopod            | De Wit et al. (2020)                                                                                                                                                                                                                                                                                                                                                             |
| <i>Labrus bergylta</i>        | Ballan wrasse            | Villegas-Ríos (2013) - from Spain                                                                                                                                                                                                                                                                                                                                                |
| <i>Leuciscus idus</i>         | Ide                      | Rohtla et al. (2015)                                                                                                                                                                                                                                                                                                                                                             |
| <i>Liparis liparis</i>        | Striped seasnail         | Corell et al. (2012)                                                                                                                                                                                                                                                                                                                                                             |
| <i>Littorina fabalis</i>      | Flat periwinkle          | Erlandsson et al. (1998)                                                                                                                                                                                                                                                                                                                                                         |
| <i>Littorina littorea</i>     | Common periwinkle        | Johannesson et al. (1988)                                                                                                                                                                                                                                                                                                                                                        |
| <i>Littorina saxatilis</i>    | Rough periwinkle         | Janson et al. (1983), Johannesson & Johannesson (1995), Erlandsson et al. (1998), Panova et al. (2006)                                                                                                                                                                                                                                                                           |
| <i>Lophelia pertusa</i>       | Spider hazards           | Dahl et al. (2012), Moksnes et al. (2014b)                                                                                                                                                                                                                                                                                                                                       |
| <i>Lota lota</i>              | Burbot                   | Aro (1989)                                                                                                                                                                                                                                                                                                                                                                       |
| <i>Merluccius merluccius</i>  | European hake            | Westgaard et al. (2017)                                                                                                                                                                                                                                                                                                                                                          |
| <i>Modiolus modiolus</i>      | Northern horse mussel    | Johnson et al. (2008), www.marlin.ac.uk - From UK                                                                                                                                                                                                                                                                                                                                |
| <i>Mytilus edulis</i>         | Blue mussel              | Gilg et al. (2003), Corell et al. (2012), Larsson et al. (2016), Strelkov et al. (2017), Stuckas et al. (2017)                                                                                                                                                                                                                                                                   |
| <i>Nerophis ophidion</i>      | Straightnose pipefish    | Corell et al. (2012)                                                                                                                                                                                                                                                                                                                                                             |
| <i>Ostrea edulis</i>          | Flat oyster              | Kinlan och Gaines (2003), Johnson et al. (2008)                                                                                                                                                                                                                                                                                                                                  |
| <i>Perca fluviatilis</i>      | European Perch           | Karås (1996), Järv (2000), Bergström et al. (2007), Bergek & Björklund (2009), Olsson et al. (2011), Ahlbeck Bergendahl et al. (2017), Hansson et al. (2019), Artfakta.se                                                                                                                                                                                                        |
| <i>Pholis gunnellus</i>       | Rock gunnel              | Corell et al. (2012)                                                                                                                                                                                                                                                                                                                                                             |
| <i>Platichthys flesus</i>     | European flounder        | Florin (2005), Hemmer-Hansen et al. (2007b), Hemmer-Hansen et al. (2007a), Florin & Höglund (2008), ICES (2010) and references in paper, Florin et al. (2013), Momigliano et al. (2017), Momigliano et al. (2018), Reis-Santos et al. (2018)                                                                                                                                     |
| <i>Platichthys solemdali</i>  | European flounder        | Momigliano et al. (2017), Momigliano et al. (2018)                                                                                                                                                                                                                                                                                                                               |

|                               |                   |                                                                                                                                                                                        |
|-------------------------------|-------------------|----------------------------------------------------------------------------------------------------------------------------------------------------------------------------------------|
| <i>Pleuronectes platessa</i>  | European plaice   | Aro (1989), Ulrich et al. (2017)                                                                                                                                                       |
| <i>Pomatoschistus minutus</i> | Sand goby         | Larmuseau et al. (2010a), Larmuseau et al. (2010b), Corell et al. (2012),                                                                                                              |
| <i>Pygospio elegans</i>       | Polychaete        | Corell et al. (2012)                                                                                                                                                                   |
| <i>Ruppia maritima</i>        | Beaked tasselweed | Triest & Sierens (2015), Triest et al. (2018)                                                                                                                                          |
| <i>Ruppia spiralis</i>        | Widgeongrass      | Triest et al. (2018)                                                                                                                                                                   |
| <i>Salmo salar</i>            | Atlantic salmon   | Jutila et al. (2003), Bergström et al. (2007), Palm et al. (2008), Pedersen et al. (2007), Tonteri et al. (2007), Palmé et al. (2012), Whitlock et al. (2018), Miettinen et al. (2021) |
| <i>Rutilus rutilus</i>        | Roach             | Hansson et al. (2019)                                                                                                                                                                  |
| <i>Salmo trutta</i>           | Sea trout         | Kalio-Nyberg et al. (2002), Bergström et al. (2007), Degerman et al. (2012), Östergren et al. (2012), Östergren & Nilsson (2012), Jonsson & Jonsson (2014), Kalio-Nyberg et al. (2017) |
| <i>Sander lucioperca</i>      | Pike-perch        | Saulamo & Thoreson (2005), Bergström et al. (2007), Björklund et al. (2007), Säisä et al. (2010), Andersson et al. (2015), Ložys et al. (2017)                                         |
| <i>Scomber scombrus</i>       | Atlantic mackerel | Jansen et al. (2012)                                                                                                                                                                   |
| <i>Scophthalmus maximus</i>   | Turbot            | Nielsen et al. (2004), Florin (2005), Bergström et al. (2007), ICES (2010) and references in paper, Florin & Höglund (2007), Florin et al. (2013)                                      |
| <i>Skeletonema marioni</i>    | Diatom            | Sefbom et al. (2018)                                                                                                                                                                   |
| <i>Solea solea</i>            | Common sole       | Symonds & Rogers (1995) – from UK, Cuveliers et al. (2012)                                                                                                                             |
| <i>Sprattus sprattus</i>      | European sprat    | Limborg et al. (2009)                                                                                                                                                                  |
| <i>Symphodus melops</i>       | Corkwing wrasse   | Halvorsen et al. (2016), Faust et al. (2018), Mattingsdal et al. (2020)                                                                                                                |
| <i>Zoarces viviparus</i>      | Eelpout           | Bergek et al. (2012), Kinitz et al. (2013)                                                                                                                                             |
| <i>Zostera marina</i>         | Eelgrass          | Orth et al. (1994) - from USA, Reusch (2002), Källström et al. (2008), Jahnke et al. (2018) and references in paper, Triest et al. (2018) and references in paper                      |
| <i>Zostera noltii</i>         | Dwarf eelgrass    | Chust et al. (2013) - from Spain                                                                                                                                                       |

## References

- Ahlbeck Bergendahl, I., P. B. Holliland, S. Hansson, and O. Karlöf. 2017. Feeding range of age 1+ year Eurasian perch *Perca fluviatilis* in the Baltic Sea. *Journal of Fish Biology* 90:2060-2072.
- Andersson, M., E. Degerman, J. Persson, and H. Ragnarsson-Stabo. 2015. Movements, recapture rate and length increment of tagged pikeperch (*Sander lucioperca*) – a basis for management in large lakes. *Fisheries Management and Ecology* 22:450-457.
- André, C., H. Svedäng, H. Knutsen, G. Dahle, P. Jonsson, A.-K. Ring, M. Sköld, and P. E. Jorde. 2016. Population structure in Atlantic cod in the eastern North Sea-Skagerrak-Kattegat: early life stage dispersal and adult migration. *BMC Research Notes* 9:63.

- Aro, E. 1989. A review of fish migration patterns in the Baltic. *Rapp. P.-v. Réun. Cons. int. Explor. Mer*:72-96.
- Barth, J. M. I., P. R. Berg, P. R. Jonsson, S. Bonanomi, H. Corell, J. Hemmer-Hansen, K. S. Jakobsen, K. Johannesson, P. E. Jorde, H. Knutsen, P.-O. Moksnes, B. Star, N. C. Stenseth, H. Svedäng, S. Jentoft, and C. André. 2017. Genome architecture enables local adaptation of Atlantic cod despite high connectivity. *Molecular Ecology* 26:4452-4466.
- Bekkevold, D., C. André, T. G. Dahlgren, L. A. W. Clausen, E. Torstensen, H. Mosegaard, G. R. Carvalho, T. B. Christensen, E. Norlinder, and D. E. Ruzzante. 2005. Environmental correlates of population differentiation in Atlantic herring. *Evolution* 59:2656-2668.
- Bekkevold, D., L. A. W. Clausen, S. Mariani, C. André, E. M. C. Hatfield, E. Torstensen, N. Ryman, G. R. Carvalho, and D. E. Ruzzante. 2011. Genetic mixed-stock analysis of Atlantic herring populations in a mixed feeding area. *Marine Ecology Progress Series* 442:187-199.
- Bekkevold, D., R. Gross, T. Arula, S. J. Helyar, and H. Ojaveer. 2016. Outlier loci detect intraspecific biodiversity amongst spring and autumn spawning herring across local scales. *PLoS ONE* 11:e0148499.
- Bekkevold, D., L. Jacobsen, J. Hemmer-Hansen, S. Berg, and C. Skov. 2015. From regionally predictable to locally complex population structure in a freshwater top predator: river systems are not always the unit of connectivity in Northern Pike *Esox lucius*. *Ecology of Freshwater Fish* 24:305-316.
- Bergek, S., and M. Björklund. 2009. Genetic and morphological divergence reveals local subdivision of perch (*Perca fluviatilis* L.). *Biological Journal of the Linnean Society* 96:746-758.
- Bergek, S., F. Franzén, M. Quack, A. Hochkirch, T. Kinitz, T. Prestegaard, and M. Appelberg. 2012. Panmixia in *Zoarces viviparus*: implications for environmental monitoring studies. *Journal of Fish Biology* 80:2302-2316.
- Bergström, L., S. Korpinen, U. Bergström, and Å. Andersson. 2007. Essential fish habitats and fish migration patterns in the Northern Baltic Sea.
- Björklund, M., T. Aho, and L. C. Larsson. 2007. Genetic differentiation in pikeperch (*Sander lucioperca*): the relative importance of gene flow, drift and common history. *Journal of Fish Biology* 71:264-278.
- Chust, G., A. Albaina, A. Aranburu, Á. Borja, O. E. Diekmann, A. Estonba, J. Franco, J. M. Garmendia, M. Iriondo, I. Muxika, F. Rendo, J. G. Rodríguez, O. Ruiz-Larrañaga, E. A. Serrão, and M. Valle. 2013. Connectivity, neutral theories and the assessment of species vulnerability to global change in temperate estuaries. *Estuarine, Coastal and Shelf Science* 131:52-63.
- Clausen, L. A. W., K.-J. Stæhr, A. Rindorf, and H. Mosegaard. 2015. Effect of spatial differences in growth on distribution of seasonally co-occurring herring *Clupea harengus* stocks. *Journal of Fish Biology* 86:228-247.
- Corander, J., K. K. Majander, L. Cheng, and J. Merilä. 2013. High degree of cryptic population differentiation in the Baltic Sea herring *Clupea harengus*. *Molecular Ecology* 22:2931-2940.
- Corell, H., P. O. Moksnes, A. Engqvist, K. Döös, and P. R. Jonsson. 2012. Depth distribution of larvae critically affects their dispersal and the efficiency of marine protected areas. *Marine Ecology Progress Series* 467:29-46.
- Coyer, J. A., A. F. Peters, W. T. Stam, and J. L. Olsen. 2003. Post-ice age recolonization and differentiation of *Fucus serratus* L. (Phaeophyceae; Fucaceae) populations in Northern Europe. *Molecular Ecology* 12:1817-1829.
- Cuveliers, E. L., M. H. D. Larmuseau, B. Hellemans, S. L. N. A. Verherstraeten, F. A. M. Volckaert, and G. E. Maes. 2012. Multi-marker estimate of genetic connectivity of sole (*Solea solea*) in the North-East Atlantic Ocean. *Marine Biology* 159:1239-1253.
- Dahl, M. P., R. T. Pereyra, T. Lundälv, and C. André. 2012. Fine-scale spatial genetic structure and clonal distribution of the cold-water coral *Lophelia pertusa*. *Coral Reefs* 31:1135-1148.

- Dannewitz, J., G. E. Maes, L. Johansson, H. Wickström, F. A. M. Volckaert, and T. Järvi. 2005. Panmixia in the European eel: a matter of time.. *Proceedings of the Royal Society B: Biological Sciences* 272:1129-1137.
- De Wit, P., P. R. Jonsson, R. T. Pereyra, M. Panova, C. André, and K. Johannesson. 2020. Spatial genetic structure in a crustacean herbivore highlights the need for local considerations in Baltic Sea biodiversity management. *Evolutionary Applications* 13:974-990.
- DeFaveri, J., P. R. Jonsson, and J. Merilä. 2013a. Heterogeneous genomic differentiation in marine threespine sticklebacks: adaptation along an environmental gradient. *Evolution* 67:2530-2546.
- DeFaveri, J., T. Shikano, N. I. A. Ghani, and J. Merilä. 2012. Contrasting population structures in two sympatric fishes in the Baltic Sea basin. *Marine Biology* 159:1659-1672.
- DeFaveri, J., T. Shikano, Y. Shimada, and J. Merilä. 2013b. High degree of genetic differentiation in marine three-spined sticklebacks (*Gasterosteus aculeatus*). *Molecular Ecology* 22:4811-4828.
- Degerman, E., K. Leonardsson, and H. Lundqvist. 2012. Coastal migrations, temporary use of neighbouring rivers, and growth of sea trout (*Salmo trutta*) from nine northern Baltic Sea rivers. *ICES Journal of Marine Science* 69:971-980.
- Delaval, A., G. Dahle, H. Knutsen, J. Devine, and A. G. V. Salvanes. 2018. Norwegian fjords contain sub-populations of roundnose grenadier *Coryphaenoides rupestris*, a deep-water fish. *Marine Ecology Progress Series* 586:181-192.
- Dudgeon, S., J. E. Kübler, W. A. Wright, R. L. Vadas Sr, and P. S. Petraitis. 2001. Natural variability in zygote dispersal of *Ascophyllum nodosum* at small spatial scales. *Functional Ecology* 15:595-604.
- Einfeldt, A. L., J. R. Doucet, and J. A. Addison. 2014. Phylogeography and cryptic introduction of the ragworm *Hediste diversicolor* (Annelida, Nereididae) in the Northwest Atlantic. *Invertebrate Biology* 133:232-241.
- Enbody, E. D., M. E. Pettersson, C. G. Sprehn, S. Palm, H. Wickström, and L. Andersson. 2021. Ecological adaptation in European eels is based on phenotypic plasticity. *Proceedings of the National Academy of Sciences* 118:e2022620118.
- Erlandsson, J., E. Rolán-Alvarez, and K. Johannesson. 1998. Migratory differences between ecotypes of the snail *Littorina saxatilis* on Galician rocky shores. *Evolutionary Ecology* 12:913-924.
- Faust, E., T. Halvorsen Kim, P. Andersen, H. Knutsen, and C. André. 2018. Cleaner fish escape salmon farms and hybridize with local wrasse populations. *Royal Society Open Science* 5:171752.
- Florin, A.-B., and J. Höglund. 2007. Absence of population structure of turbot (*Psetta maxima*) in the Baltic Sea. *Molecular Ecology* 16:115-126.
- Florin, A. B. 2005. Flatfishes in the Baltic Sea - a review of biology and fishery with a focus on Swedish conditions.
- Florin, A. B., U. Bergström, D. Ustups, K. Lundström, and P. R. Jonsson. 2013. Effects of a large northern European no-take zone on flatfish populations. *Journal of Fish Biology* 83:939-962.
- Florin, A. B., and J. Höglund. 2008. Population structure of flounder (*Platichthys flesus*) in the Baltic Sea: differences among demersal and pelagic spawners. *Heredity* 101:27-38.
- Gaggiotti, O. E., D. Bekkevold, H. B. H. Jørgensen, M. Foll, G. R. Carvalho, C. Andre, and D. E. Ruzzante. 2009. Disentangling the effects of evolutionary, demographic and environmental factors influencing genetic structure of natural populations: Atlantic herring as a case study. *Evolution* 63:2939-2951.
- Gilg, M. R., and T. J. Hilbish. 2003. The geography of marine larval dispersal: coupling genetics with fine-scale physical oceanography. *Ecology* 84:2989-2998.



- Guo, B., J. DeFaveri, G. Sotelo, A. Nair, and J. Merilä. 2015. Population genomic evidence for adaptive differentiation in Baltic Sea three-spined sticklebacks. *BMC Biology* 13:19.
- Gutsch, M., and J. Hoffman. 2016. A review of Ruffe (*Gymnocephalus cernua*) life history in its native versus non-native range. *Reviews in Fish Biology and Fisheries* 26:213-233.
- Halvorsen, K. T., T. K. Sjørdalen, L. A. Vøllestad, A. B. Skiftesvik, S. H. Espeland, and E. M. Olsen. 2016. Sex- and size-selective harvesting of corkwing wrasse (*Symphodus melops*)—a cleaner fish used in salmonid aquaculture. *ICES Journal of Marine Science* 74:660-669.
- Hansson, S., U. Larsson, and J. Walve. 2019. Site fidelity in perch (*Perca fluviatilis*) and roach (*Rutilus rutilus*) in two Baltic Sea coastal areas. *Estuarine, Coastal and Shelf Science* 226:106261.
- Havenhand, J. N. 1991. Fertilisation and the potential for dispersal of gametes and larvae in the Solitary Ascidian *Ascidia Mentula* Müller. *Ophelia* 33:01-15.
- Hemmer-Hansen, J., E. E. Nielsen, J. Frydenberg, and V. Loeschcke. 2007a. Adaptive divergence in a high gene flow environment: Hsc70 variation in the European flounder (*Platichthys flesus* L.). *Heredity* 99:592-600.
- Hemmer-Hansen, J., E. E. Nielsen, P. Gronkjaer, and V. Loeschcke. 2007b. Evolutionary mechanisms shaping the genetic population structure of marine fishes; lessons from the European flounder (*Platichthys flesus* L.). *Molecular Ecology* 16:3104-3118.
- Hudson, J., K. Johannesson, C. D. McQuaid, and M. Rius. 2020. Secondary contacts and genetic admixture shape colonization by an amphiatlantic epibenthic invertebrate. *Evolutionary Applications* 13:600-612.
- Huserbråten, M. B. O., E. Moland, H. Knutsen, E. M. Olsen, C. André, and N. C. Stenseth. 2013. Conservation, spillover and gene flow within a network of Northern European marine protected areas. *PLoS ONE* 8:e73388.
- ICES. 2010. Report of the ICES/HELCOM Workshop on Flatfish in the Baltic Sea (WKFLABA), 8 - 11 November 2010, Öregrund, Sweden. ICES CM 2010/ACOM:68. 85pp.
- Jacobsen, L., D. Bekkevold, S. Berg, N. Jepsen, A. Koed, K. Aarestrup, H. Baktoft, and C. Skov. 2017. Pike (*Esox lucius* L.) on the edge: consistent individual movement patterns in transitional waters of the western Baltic. *Hydrobiologia* 784:143-154.
- Jahnke, M., P. R. Jonsson, P. O. Moksnes, L. O. Loo, J. M. Nilsson, and J. L. Olsen. 2018. Seascape genetics and biophysical connectivity modelling support conservation of the seagrass *Zostera marina* in the Skagerrak–Kattegat region of the eastern North Sea. *Evolutionary Applications* 11:645-661.
- Jansen, T., A. Campbell, C. Kelly, H. Hátún, and M. R. Payne. 2012. Migration and fisheries of north east Atlantic mackerel (*Scomber scombrus*) in autumn and winter. *PLoS ONE* 7:e51541.
- Janson, K. 1983. Selection and migration in two distinct phenotypes of *Littorina saxatilis* in Sweden. *Oecologia* 59:58-61.
- Jiménez-Mena, B., A. Le Moan, A. Christensen, M. van Deurs, H. Mosegaard, J. Hemmer-Hansen, and D. Bekkevold. 2020. Weak genetic structure despite strong genomic signal in lesser sandeel in the North Sea. *Evolutionary Applications* 13:376-387.
- Johannesson, K. 1988. The paradox of Rockall: why is a brooding gastropod (*Littorina saxatilis*) more widespread than one having a planktonic larval dispersal stage (*L. littorea*)? *Marine Biology* 99:507-513.
- Johannesson, K., and B. Johannesson. 1995. Dispersal and population expansion in a direct developing marine snail (*Littorina saxatilis*) following a severe population bottleneck. *Hydrobiologia* 309:173-180.
- Johnson, M. P., T. P. Crowe, R. McAllen, and A. L. Allcock. 2008. Characterizing the marine Natura 2000 network for the Atlantic region. *Aquatic Conservation: Marine and Freshwater Ecosystems* 18:86-97.

- Jonsson, B., and N. Jonsson. 2014. Naturally and hatchery produced European trout *Salmo trutta*: do their marine survival and dispersal differ? *Journal of Coastal Conservation* 18:79-87.
- Jonsson, P. R., J. Kotta, H. C. Andersson, K. Herkül, E. Virtanen, A. N. Sandman, and K. Johannesson. 2018. High climate velocity and population fragmentation may constrain climate-driven range shift of the key habitat former *Fucus vesiculosus*. *Diversity and Distributions* 24:892-905.
- Jorde, P. E., H. Knutsen, S. H. Espeland, and N. C. Stenseth. 2007. Spatial scale of genetic structuring in coastal cod *Gadus morhua* and geographic extent of local populations. *Marine Ecology Progress Series* 343:229-237.
- Jutila, E., E. Jokikokko, I. Kallio-Nyberg, I. Saloniemi, and P. Pasanen. 2003. Differences in sea migration between wild and reared Atlantic salmon (*Salmo salar* L.) in the Baltic Sea. *Fisheries Research* 60:333-343.
- Järv, L. 2000. Migrations of the perch (*Perca fluviatilis* L.) in the coastal waters of Western Estonia. *Proc. Estonian Acad. Sci. Biol. Ecol.* 49:270-276.
- Jørgensen, H. B. H., M. M. Hansen, D. Bekkevold, D. E. Ruzzante, and V. Loeschcke. 2005. Marine landscapes and population genetic structure of herring (*Clupea harengus* L.) in the Baltic Sea. *Molecular Ecology* 14:3219-3234.
- Kallio-Nyberg, I., A. Saura, and P. Ahlfors. 2002. Sea migration pattern of two sea trout (*Salmo trutta*) stocks released into the Gulf of Finland. *Ann. Zool. Fennici* 39:221-235.
- Kallio-Nyberg, I., L. Veneranta, I. Saloniemi, E. Jutila, and T. Pakarinen. 2017. Spatial distribution of migratory *Salmo trutta* in the northern Baltic Sea. *Boreal Environmental Research* 22:431-444.
- Karlsson, K., and M. F. Christiansen. 1996. Occurrence and population composition of the edible crab (*Cancer pagurus*) on rocky shores of an islet on the South Coast of Norway. *Sarsia* 81:307-314.
- Karås, P. 1996. Basic abiotic conditions for production of perch (*Perca fluviatilis* L.) young-of-the-year in the Gulf of Bothnia. *Annales Zoologici Fennici* 33:371-381.
- Karås, P., and H. Lehtonen. 1993. Patterns of movement and migration in pike (*Exos lucius* L.) in the Baltic Sea. *Nordic Journal of Freshwater Research*:72-79.
- Kijewska, A., B. Wicaszek, and T. Kijewski. 2011. Analysis of population and taxonomical structure of Atlantic cod *Gadus morhua* (Actinopterygii: Gadiformes: Gadidae) from the Baltic Sea with use of microsatellite DNA. *Acta Ichthyologica Et Piscatoria* 41:307-314.
- Kinitz, T., M. Quack, M. Paulus, M. Veith, S. Bergek, J. Strand, A. Tuvikene, A. Soirinsuo, and A. Hochkirch. 2013. Strong isolation-by-distance in the absence of genetic population structure in the eelpout (*Zoarces viviparus*, Linnaeus 1758). *Ecological Indicators* 27:116-122.
- Kinlan, B. P., and S. D. Gaines. 2003. Propagule dispersal in marine and terrestrial environments: a community perspective. *Ecology* 84:2007-2020.
- Knutsen, H., P. E. Jorde, C. André, and N. C. Stenseth. 2003. Fine-scaled geographical population structuring in a highly mobile marine species: the Atlantic cod. *Molecular Ecology* 12:385-394.
- Knutsen, H., E. M. Olsen, P. E. Jorde, S. H. Espeland, C. André, and N. C. Stenseth. 2011. Are low but statistically significant levels of genetic differentiation in marine fishes 'biologically meaningful'? A case study of coastal Atlantic cod. *Molecular Ecology* 20:768-783.
- Källström, B., A. Nyqvist, P. Åberg, M. Bodin, and C. André. 2008. Seed rafting as a dispersal strategy for eelgrass (*Zostera marina*). *Aquatic Botany* 88:148-153.
- Laikre, L., L. M. Miller, A. Palmé, S. Palm, A. R. Kapuscinski, G. Thoreson, and N. Ryman. 2005. Spatial genetic structure of northern pike (*Esox lucius*) in the Baltic Sea. *Molecular Ecology* 14:1955-1964.

- Larmuseau, M. H. D., J. A. M. Raeymaekers, B. Hellemans, J. K. J. Van Houdt, and F. A. M. Volckaert. 2010a. Mito-nuclear discordance in the degree of population differentiation in a marine goby. *Heredity* 105:532.
- Larmuseau, M. H. D., K. Vancampenhout, J. A. M. Raeymaekers, J. K. J. Van Houdt, and F. A. M. Volckaert. 2010b. Differential modes of selection on the rhodopsin gene in coastal Baltic and North Sea populations of the sand goby, *Pomatoschistus minutus*. *Molecular Ecology* 19:2256-2268.
- Larsson, A. I., L. M. Granhag, and P. R. Jonsson. 2016. Instantaneous flow structures and opportunities for larval settlement: barnacle larvae swim to settle. *PLoS ONE* 11:e0158957.
- Larsson, L. C., L. Laikre, C. André, T. G. Dahlgren, and N. Ryman. 2010. Temporally stable genetic structure of heavily exploited Atlantic herring (*Clupea harengus*) in Swedish waters. *Heredity* 104:40.
- Larsson, P., P. Tibblin, P. Koch-Schmidt, O. Engstedt, J. Nilsson, O. Nordahl, and A. Forsman. 2015. Ecology, evolution, and management strategies of northern pike populations in the Baltic Sea. *Ambio* 44:451-461.
- Lehtonen, H., and M. Himberg. 1992. Baltic Sea migration patterns of anadromous, *Coregonus Lavaretus* (L) S. Str., and sea-spawning European whitefish, C.L. Widegreni Malmgren. *Pol. Arch. Hydrobiol.* 39:463-472.
- Limborg, M. T., J. S. Pedersen, J. Hemmer-Hansen, J. Tomkiewicz, and D. Bekkevold. 2009. Genetic population structure of European sprat *Sprattus sprattus*: differentiation across a steep environmental gradient in a small pelagic fish. *Marine Ecology Progress Series* 379:213-224.
- Ložys, L., J.-C. Shiao, Y. Iizuka, A. Minde, Ž. Pūtys, E. Jakubavičiūtė, J. Dainys, H. Gorfine, and W.-N. Tzeng. 2017. Habitat use and migratory behaviour of pikeperch *Sander lucioperca* in Lithuanian and Latvian waters as inferred from otolith Sr:Ca ratios. *Estuarine, Coastal and Shelf Science* 198:43-52.
- Mattingsdal, M., P. E. Jorde, H. Knutsen, S. Jentoft, N. C. Stenseth, M. Sodeland, J. I. Robalo, M. M. Hansen, C. André, and E. Blanco Gonzalez. 2020. Demographic history has shaped the strongly differentiated corkwing wrasse populations in Northern Europe. *Molecular Ecology* 29:160-171.
- Miettinen, A., S. Palm, J. Dannewitz, E. Lind, C. R. Primmer, A. Romakkaniemi, J. Östergren, and V. L. Pritchard. 2021. A large wild salmon stock shows genetic and life history differentiation within, but not between, rivers. *Conservation Genetics* 22:35-51.
- Moksnes, P.-O., H. Corell, K. Tryman, R. Hordoir, and P. R. Jonsson. 2014a. Larval behavior and dispersal mechanisms in shore crab larvae (*Carcinus maenas*): Local adaptations to different tidal environments? *Limnology and Oceanography* 59:588-602.
- Moksnes, P. O., P. R. Jonsson, M. Nilsson Jacobi, and K. Vikström. 2014b. Larval connectivity and ecological coherence of marine protected areas (MPAs) in the Kattegat-Skagerrak region. Swedish Institute for the Marine Environment. Report.
- Moland, E., E. Moland Olsen, H. Knutsen, J. A. Knutsen, S. E. Enersen, C. André, and N. C. Stenseth. 2011a. Activity patterns of wild European lobster *Homarus gammarus* in coastal marine reserves: implications for future reserve design. *Marine Ecology Progress Series* 429:197-207.
- Moland, E., E. M. Olsen, K. Andvord, J. A. Knutsen, and N. C. Stenseth. 2011b. Home range of European lobster (*Homarus gammarus*) in a marine reserve: implications for future reserve design. *Canadian Journal of Fisheries and Aquatic Sciences* 68:1197-1210.
- Moland, E., E. M. Olsen, H. Knutsen, P. Garrigou, S. H. Espeland, A. R. Kleiven, C. André, and J. A. Knutsen. 2013a. Lobster and cod benefit from small-scale northern marine protected areas: inference from an empirical before–after control–impact study. *Proceedings of the Royal Society B: Biological Sciences* 280:1754.
- Moland, E., M. Ulmestrand, E. M. Olsen, and N. C. Stenseth. 2013b. Long-term decrease in sex-specific natural mortality of European lobster within a marine protected area. *Marine Ecology Progress Series* 491:153-164.

- Momigliano, P., G. P. J. Denys, H. Jokinen, and J. Merilä. 2018. *Platichthys solemdali* sp. nov. (Actinopterygii, Pleuronectiformes): A new flounder species from the Baltic Sea. *Frontiers in Marine Science* 5:225.
- Momigliano, P., H. Jokinen, A. Fraimout, A.-B. Florin, A. Norkko, and J. Merilä. 2017. Extraordinarily rapid speciation in a marine fish. *Proceedings of the National Academy of Sciences* 114:6074-6079.
- Möller, S., H. M. Winkler, S. Richter, and R. Bastrop. 2021. Genetic population structure of pike (*Esox lucius* Linnaeus, 1758) in the brackish lagoons of the southern Baltic Sea. *Ecology of Freshwater Fish* 30:140-149.
- Nielsen, E. E., P. Grønkjær, D. Meldrup, and H. Paulsen. 2005. Retention of juveniles within a hybrid zone between North Sea and Baltic Sea Atlantic cod (*Gadus morhua*). *Canadian Journal of Fisheries and Aquatic Sciences* 62:2219-2225.
- Nielsen, E. E., M. M. Hansen, D. E. Ruzzante, D. Meldrup, and P. Grønkjær. 2003. Evidence of a hybrid-zone in Atlantic cod (*Gadus morhua*) in the Baltic and the Danish Belt Sea revealed by individual admixture analysis. *Molecular Ecology* 12:1497-1508.
- Nielsen, E. E., P. H. Nielsen, D. Meldrup, and M. M. Hansen. 2004. Genetic population structure of turbot (*Scophthalmus maximus* L.) supports the presence of multiple hybrid zones for marine fishes in the transition zone between the Baltic Sea and the North Sea. *Molecular Ecology* 13:585-595.
- Nordahl, O., P. Koch-Schmidt, J. Sunde, Y. Yıldırım, P. Tibblin, A. Forsman, and P. Larsson. 2019. Genetic differentiation between and within ecotypes of pike (*Esox lucius*) in the Baltic Sea. *Aquatic Conservation: Marine and Freshwater Ecosystems* 29:1923-1935.
- Olsson, J., A.-B. Florin, K. Mo, T. Aho, and N. Ryman. 2012. Genetic structure of whitefish (*Coregonus maraena*) in the Baltic Sea. *Estuarine, Coastal and Shelf Science* 97:104-113.
- Olsson, J., K. Mo, A. B. Florin, T. Aho, and N. Ryman. 2011. Genetic population structure of perch *Perca fluviatilis* along the Swedish coast of the Baltic Sea. *Journal of Fish Biology* 79:122-137.
- Orth, R. J., M. Luckenbach, and K. A. Moore. 1994. Seed dispersal in a marine macrophyte: implications for colonization and restoration. *Ecology* 75:1927-1939.
- Palm, S., J. Dannewitz, T. Järvi, M.-L. Koljonen, T. Prestegard, and K. H. Olsén. 2008. No indications of Atlantic salmon (*Salmo salar*) shoaling with kin in the Baltic Sea. *Canadian Journal of Fisheries and Aquatic Sciences* 65:1738-1748.
- Palmé, A., L. Wennerström, P. Guban, N. Ryman, and L. Laikre. 2012. Compromising Baltic salmon genetic diversity - conservation genetic risks associated with compensatory releases of salmon in the Baltic Sea
- Panova, M., J. Hollander, and K. Johannesson. 2006. Site-specific genetic divergence in parallel hybrid zones suggests nonallopatric evolution of reproductive barriers. *Molecular Ecology* 15:4021-4031.
- Pedersen, S., G. Rasmussen, E. E. Nielsen, L. Karlsson, and P. Nyberg. 2007. Straying of Atlantic salmon, *Salmo salar*, from delayed and coastal releases in the Baltic Sea, with special focus on the Swedish west coast. *Fisheries Management and Ecology* 14:21-32.
- Pereyra, R. T., C. Huenchunir, D. Johannesson, H. Forslund, L. Kautsky, P. R. Jonsson, and K. Johannesson. 2013. Parallel speciation or long-distance dispersal? Lessons from seaweeds (*Fucus*) in the Baltic Sea. *Journal of Evolutionary Biology* 26:1727-1737.
- Reis-Santos, P., S. E. Tanner, M. A. Aboim, R. P. Vasconcelos, J. Laroche, G. Charrier, M. Pérez, P. Presa, B. M. Gillanders, and H. N. Cabral. 2018. Reconciling differences in natural tags to infer demographic and genetic connectivity in marine fish populations. *Scientific Reports* 8:10343.
- Reusch, T. B. H. 2002. Microsatellites reveal high population connectivity in eelgrass (*Zostera marina*) in two contrasting coastal areas. *Limnology and Oceanography* 47:78-85.

- Rohtla, M., R. Svirgdsen, I. Taal, L. Saks, R. Eschbaum, and M. Vetemaa. 2015. Life-history characteristics of the *Leuciscus idus* in the Eastern Baltic Sea. *Fisheries Management and Ecology* 22:239-248.
- Rothäusler, E., H. Corell, and V. Jormalainen. 2015. Abundance and dispersal trajectories of floating *Fucus vesiculosus* in the Northern Baltic Sea. *Limnology and Oceanography* 60:2173-2184.
- Saulamo, K., and E. Neuman. 2002. Local management of Baltic fish stocks - significance of migrations. *Fiskeriverket, Finfo* 2002:9, 1-18.
- Saulamo, K., and G. Thoresson. 2005. Management of pikeperch migrating over management areas in a Baltic Archipelago area. *AMBIO: A Journal of the Human Environment* 34:120-124.
- Sayer, M. D. J. 2001. Duration of refuge residence by goldsinny, *Ctenolabrus rupestris*. *Journal of the Marine Biological Association of the United Kingdom* 79:571-572.
- Sefbom, J., A. Kremp, K. Rengefors, P. R. Jonsson, C. Sjöqvist, and A. Godhe. 2018. A planktonic diatom displays genetic structure over small spatial scales. *Environmental Microbiology* 20:2783-2795.
- Spies, I., L. Hauser, P. E. Jorde, H. Knutsen, A. E. Punt, L. A. Rogers, and N. C. Stenseth. 2018. Inferring genetic connectivity in real populations, exemplified by coastal and oceanic Atlantic cod. *Proceedings of the National Academy of Sciences* 115:4945-4950.
- Stakėnas, S., and A. Pilinkovskij. 2019. Migration patterns and survival of stocked Atlantic sturgeon (*Acipenser oxyrinchus* Mitchill, 1815) in Nemunas Basin, Baltic Sea. *Journal of Applied Ichthyology* 35:128-137.
- Strelkov, P., M. Katolikova, and R. Väinölä. 2017. Temporal change of the Baltic Sea–North Sea blue mussel hybrid zone over two decades. *Marine Biology* 164:214.
- Stroganov, A. N., M. Bleil, R. Oeberst, H. Winkler, and A. V. Semenova. 2013. On differentiation of cod (*Gadus morhua* L.) groups in Baltic Sea. *Russian Journal of Genetics* 49:937-944.
- Stuckas, H., L. Knöbel, H. Schade, C. Breusing, H. H. Hinrichsen, M. Bartel, K. Langguth, and F. Melzner. 2017. Combining hydrodynamic modelling with genetics: can passive larval drift shape the genetic structure of Baltic *Mytilus* populations? *Molecular Ecology* 26:2765-2782.
- Svedäng, H., J. M. I. Barth, A. Svenson, P. Jonsson, S. Jentoft, H. Knutsen, and C. André. 2018. Local cod (*Gadus morhua*) revealed by egg surveys and population genetic analysis after longstanding depletion on the Swedish Skagerrak coast. *ICES Journal of Marine Science* 76:418-429.
- Symonds, D. J., and S. I. Rogers. 1995. The influence of spawning and nursery grounds on the distribution of sole *Solea solea* (L.) in the Irish Sea, Bristol Channel and adjacent areas. *Journal of Experimental Marine Biology and Ecology* 190:243-261.
- Säisä, M., M. Salminen, M.-L. Koljonen, and J. Ruuhijärvi. 2010. Coastal and freshwater pikeperch (*Sander lucioperca*) populations differ genetically in the Baltic Sea basin. *Hereditas* 147:205-214.
- Tatarenkov, A., R. B. Jönsson, L. Kautsky, and K. Johannesson. 2007. Genetic structure in populations of *Fucus vesiculosus* (Phaeophyceae) over spatial scales from 10 m to 800 km. *Journal of Phycology* 43:675-685.
- Teacher, A. G., C. André, P. R. Jonsson, and J. Merilä. 2013. Oceanographic connectivity and environmental correlates of genetic structuring in Atlantic herring in the Baltic Sea. *Evolutionary Applications* 6:549-567.
- Thorbjørnsen, S. H., E. Moland, M. B. O. Huserbråten, J. A. Knutsen, H. Knutsen, and E. M. Olsen. 2018. Replicated marine protected areas (MPAs) support movement of larger, but not more, European lobsters to neighbouring fished areas. *Marine Ecology Progress Series* 595:123-133.
- Tibblin, P., A. Forsman, T. Borger, and P. Larsson. 2016. Causes and consequences of repeatability, flexibility and individual fine-tuning of migratory timing in pike. *Journal of Animal Ecology* 85:136-145.

- Tonteri, A., A. J. Veselov, S. Titov, J. Lumme, and C. R. Primmer. 2007. The effect of migratory behaviour on genetic diversity and population divergence: a comparison of anadromous and freshwater Atlantic salmon *Salmo salar*. *Journal of Fish Biology* 70:381-398.
- Triest, L., and T. Sierens. 2015. Strong bottlenecks, inbreeding and multiple hybridization of threatened European *Ruppia maritima* populations. *Aquatic Botany* 125:31-43.
- Triest, L., T. Sierens, D. Menemenlis, and T. Van der Stocken. 2018. Inferring connectivity range in submerged aquatic populations (*Ruppia* L.) along European coastal lagoons from genetic imprint and simulated dispersal trajectories. *Frontiers in Plant Science* 9:806.
- Ulrich, C., J. Hemmer-Hansen, J. Boje, A. Christensen, K. Hüsey, H. Sun, and L. W. Clausen. 2017. Variability and connectivity of plaice populations from the Eastern North Sea to the Baltic Sea, part II. Biological evidence of population mixing. *Journal of Sea Research* 120:13-23.
- Ungfors, A., H. Hallbäck, and P. G. Nilsson. 2007. Movement of adult edible crab (*Cancer pagurus* L.) at the Swedish West Coast by mark-recapture and acoustic tracking. *Fisheries Research* 84:345-357.
- Ungfors, A., N. J. McKeown, P. W. Shaw, and C. André. 2009. Lack of spatial genetic variation in the edible crab (*Cancer pagurus*) in the Kattegat–Skagerrak area. *ICES Journal of Marine Science* 66:462-469.
- Weber, W. 1975. A tagging experiment on spring-spawning herring of the Kiel Bay. *Berichte der Deutschen Wissenschaftlichen Kommission fuer Meeresforschung* 24:184-188.
- Wennerström, L., J. Olsson, N. Ryman, and L. Laikre. 2016. Temporally stable, weak genetic structuring in brackish water northern pike (*Esox lucius*) in the Baltic Sea indicates a contrasting divergence pattern relative to freshwater populations. *Canadian Journal of Fisheries and Aquatic Sciences* 74:562-571.
- Westgaard, J.-I., A. Staby, J. Aanestad Godiksen, A. J. Geffen, A. Svensson, G. Charrier, H. Svedäng, and C. André. 2017. Large and fine scale population structure in European hake (*Merluccius merluccius*) in the Northeast Atlantic. *ICES Journal of Marine Science* 74:1300-1310.
- Whitlock, R., S. Mäntyniemi, S. Palm, M.-L. Koljonen, J. Dannowitz, and J. Östergren. 2018. Integrating genetic analysis of mixed populations with a spatially explicit population dynamics model. *Methods in Ecology and Evolution* 9:1017-1035.
- Whittaker, B. A., S. Consuegra, and C. Garcia de Leaniz. 2018. Genetic and phenotypic differentiation of lumpfish (*Cyclopterus lumpus*) across the North Atlantic: implications for conservation and aquaculture. *PeerJ* 6:e5974.
- Villegas-Ríos, D., J. Alós, D. March, M. Palmer, G. Mucientes, and F. Saborido-Rey. 2013. Home range and diel behavior of the ballan wrasse, *Labrus bergylta*, determined by acoustic telemetry. *Journal of Sea Research* 80:61-71.
- Øresland, V., and C. André. 2008. Larval group differentiation in Atlantic cod (*Gadus morhua*) inside and outside the Gullmar Fjord. *Fisheries Research* 90:9-16.
- Øresland, V., and M. Ulmestrand. 2013. European lobster subpopulations from limited adult movements and larval retention. *ICES Journal of Marine Science* 70:532-539.
- Östergren, J., and J. Nilsson. 2012. Importance of life-history and landscape characteristics for genetic structure and genetic diversity of brown trout (*Salmo trutta* L.). *Ecology of Freshwater Fish* 21:119-133.
- Östergren, J., J. Nilsson, and H. Lundqvist. 2012. Linking genetic assignment tests with telemetry enhances understanding of spawning migration and homing in sea trout *Salmo trutta* L. *Hydrobiologia* 691:123-134.
